# Supplementary material
Source: Springer Nature journal article supplement (https://www.springermedizin.de/resource/supplementary/12936_2011_1944_MOESM2_ESM.pdf/9542138)
Supplement: MOESM2 [file 9542138]

**A**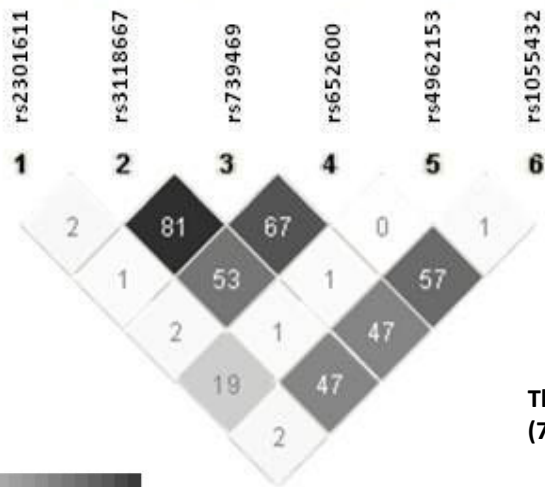

Thai malaria patients  
(708 samples)

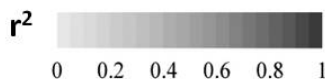**B**

| Haplotype | rs2301611 | rs3118667 | rs739469 | rs652600 | <b>rs4962153</b> | rs1055432 | Mild  | Cerebral | Permutation<br><i>P</i> -value |
|-----------|-----------|-----------|----------|----------|------------------|-----------|-------|----------|--------------------------------|
| H1        | T         | T         | C        | T        | G                | C         | 0.539 | 0.588    | 1.0                            |
| H2        | T         | C         | G        | C        | G                | A         | 0.221 | 0.236    | 1.0                            |
| H3        | T         | T         | C        | C        | G                | A         | 0.050 | 0.015    | 0.69                           |
| H4        | T         | C         | G        | C        | G                | C         | 0.034 | 0.033    | 1.0                            |
| H5        | T         | T         | C        | T        | G                | A         | 0.021 | 0.041    | 0.22                           |
| H6        | C         | T         | C        | T        | G                | C         | 0.025 | 0.018    | 1.0                            |
| H7        | T         | T         | C        | C        | <b>A</b>         | C         | 0.026 | 0.005    | 0.75                           |
| H8        | C         | T         | C        | T        | <b>A</b>         | C         | 0.024 | 0.000    | 0.50                           |
